# Supplementary material
Source: publisher figshare collection journal article supplement (https://gsajournals.figshare.com/ndownloader/files/26754092)
Supplement: Supplementary file 1 [file 26754092]

## Sheet: Sheet1
Table S5 Variance component percentage estimates of ruler height from Equation 3.
Variance component (Random effect)	Percentage of variation explained by each variable component for each type of height measurement by ruler
	TH	FH	EH
Population	63.8***	75.4***	78.2***
SNP1	0.5***	0.1***	0.1***
Population*SNP1	0.2***	0.4***	0.8***
SNP2	5.0***	2.3	0.3***
Population*SNP2	0.8***	0.2***	0.4***
SNP1*SNP2	0.1***	0.1***	0.6***
Population*SNP1*SNP2	0.1***	0.1***	0.1***
Replication	3.4	2.2***	1
Row	1.4***	1.1***	0.2***
Range	9.9***	7.0***	3.5***
Residual	14.9*	11.1	14.8
Total variation in number	467.8	515.8	299.0**
Repeatability (R)	0.9	0.93	0.91*
*, **, *** are the significance level of 0.05, 0.01 and 0.001 respectively.
